# Supplementary material for: Searching for a Paradigm Shift in Auger-Electron Cancer Therapy with Tumor-Specific Radiopeptides Targeting the Mitochondria and/or the Cell Nucleus
Source: MDPI journal article supplement (doi:10.3390/ijms23137238), 2022-06-29
Supplement: s1 [file s1]

## Supplementary Material

### Searching for a Paradigm Shift in Auger-Electron Cancer Therapy with Tumor-Specific Radiopeptides Targeting the Mitochondria and/or the Cell Nucleus

Célia Fernandes<sup>1,2</sup>, Elisa Palma<sup>1</sup>, Francisco Silva<sup>1</sup>, Ana Belchior<sup>1</sup>, Catarina I. G. Pinto<sup>1</sup>, Joana F. Guerreiro<sup>1</sup>, Hugo M. Botelho<sup>3</sup>, Filipa Mendes<sup>1,2</sup>, Paula Raposinho<sup>1,2,\*</sup>, António Paulo<sup>1,2,\*</sup>

FIGURE S 1. \_\_\_\_\_ ERROR! BOOKMARK NOT DEFINED.

FIGURE S 2. \_\_\_\_\_ ERROR! BOOKMARK NOT DEFINED.

FIGURE S 3. \_\_\_\_\_ 3

FIGURE S 4. \_\_\_\_\_ 4

A)

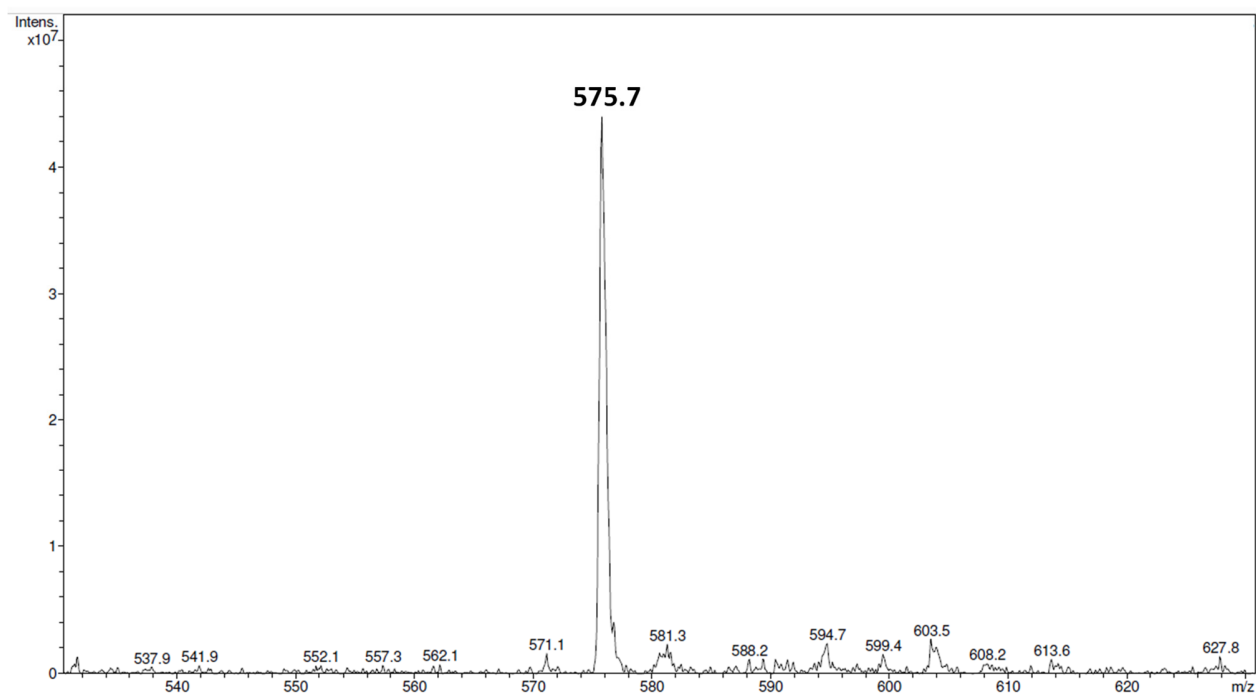

B)

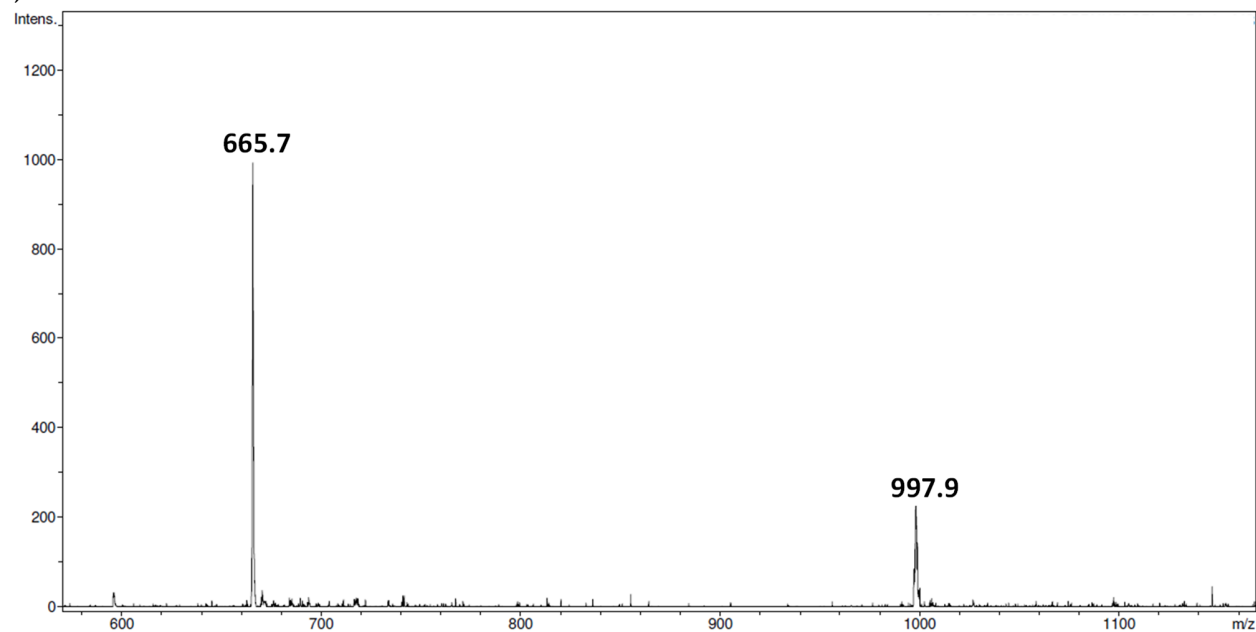

**Figure S1.** A) ESI-MS spectrum of compound **AO-Pz-BBN** ( $m/z$  calcd for  $[C_{84}H_{123}N_{24}O_{14}S + 2H]^{3+}$ : 575.65; found  $[M + 2H]^{3+}$  575.7); B) ESI-MS spectrum of compound **Re-AO-BBN** ( $m/z$  calcd for  $[C_{87}H_{123}N_{24}O_{17}SRe + H]^{3+}$  = 665.29; found  $[M+H]^{3+}$  665.7), and  $[C_{87}H_{123}N_{24}O_{17}SRe]^{2+}$  = 997.44; found  $[M]^{2+}$  997.9).

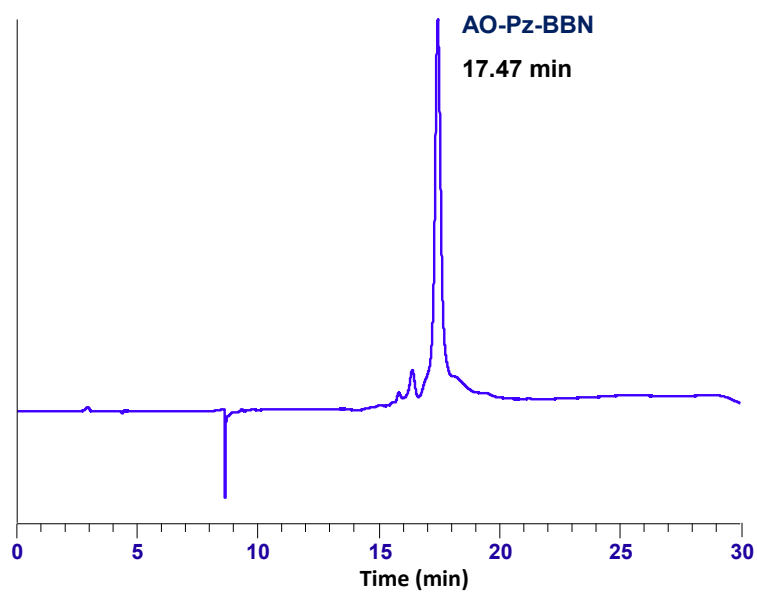

**Figure S2.** HPLC chromatogram (method II) of **AO-Pz-BBN** (detection at  $\lambda=254$  nm).

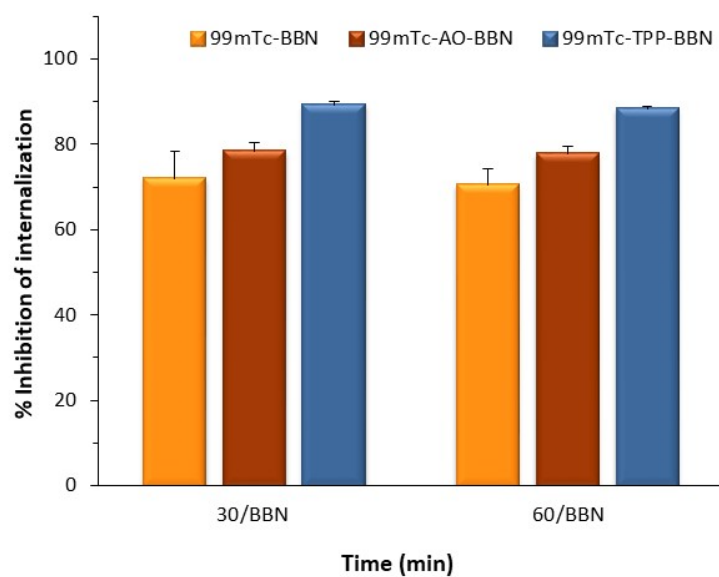

**Figure S3.** GRP receptor-blocking study. Inhibition of internalization of  $^{99m}\text{Tc}$ -BBN,  $^{99m}\text{Tc}$ -AO-BBN and  $^{99m}\text{Tc}$ -TPP-BBN by coincubation with [Tyr<sup>4</sup>]-BBN (0.25  $\mu\text{g}/0.5$  mL/well) in PC3 cells, at 37 °C. Results were calculated from independent biological replicates (mean  $\pm$  SEM, n = 4).

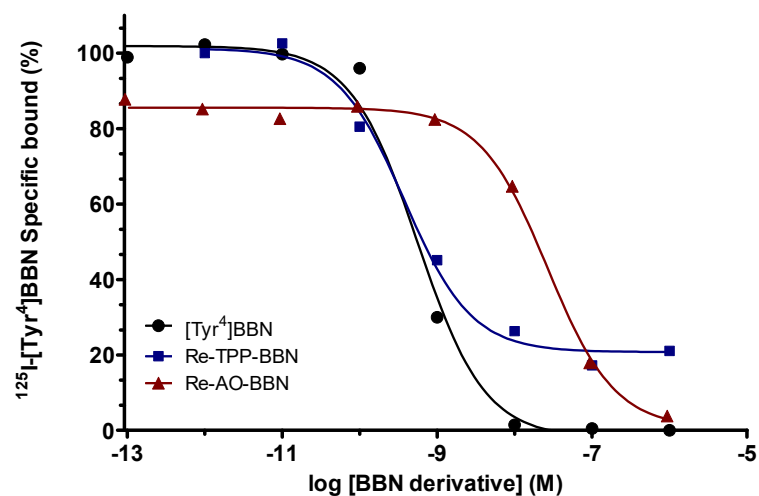

**Figure S4.** Competitive binding curves for BBN derivatives. *In vitro* inhibition of  $^{125}\text{I}$ -[Tyr<sup>4</sup>]-BBN binding to GRPR on PC3 prostate cell line by [Tyr<sup>4</sup>]-BBN peptide ( $\text{IC}_{50} = 0.56 \pm 0.16 \text{ nM}$ ), **Re-AO-BBN** ( $\text{IC}_{50} = 26.5 \pm 6.8 \text{ nM}$ ) and **Re-TPP-BBN** ( $\text{IC}_{50} = 0.38 \pm 0.14 \text{ nM}$ ). Results expressed as percent of binding were calculated from independent replicates (mean  $\pm$  SEM,  $n = 3$ ).
